# Supplementary material for: Predictors of post-thrombolysis symptomatic intracranial hemorrhage in Chinese patients with acute ischemic stroke
Source: PubMed Central journal article supplement (PMC5602541; doi:10.1371/journal.pone.0184646), 2017-09-18
Supplement: pone.0184646.s001.pdf [file pone.0184646.s001.pdf]

### 北京天坛医院临床研究伦理委员会批件

|                                                                                                                                                                                                                                                                                                                                                                                                                               |                       |
|-------------------------------------------------------------------------------------------------------------------------------------------------------------------------------------------------------------------------------------------------------------------------------------------------------------------------------------------------------------------------------------------------------------------------------|-----------------------|
| 临床研究项目名称                                                                                                                                                                                                                                                                                                                                                                                                                      | 急性缺血性卒中溶栓登记研究 (TRAIS) |
| 项目承担单位                                                                                                                                                                                                                                                                                                                                                                                                                        | 首都医科大学附属北京天坛医院        |
| 项目组织实施单位                                                                                                                                                                                                                                                                                                                                                                                                                      | 中华人民共和国卫生部            |
| <p>研究内容简介： TRAIS 试验为“十一五”国家科技支撑项目分课题（项目编号 2006BAI01A11）。为开放的、多中心、前瞻性、非随机的观察性研究，预计在中国有资质进行急性缺血性脑卒中静脉溶栓的 50 家研究中心展开登记研究。符合纳入标准的患者将被随访 3 个月。随访内容：症状性脑出血和死亡作为主要安全性结局指标；生活自理能力作为次要结局指标。研究结果将公开和不断更新。指导委员会每 6 个月评价一次所有研究结果，决定是否建议修改研究设计或由于安全原因终止研究。</p>                                                                                                                                                                             |                       |
| 同意者签字：                                                                                                                                                                                                                                                                                                                                                                                                                        | 不同意者签字                |
| 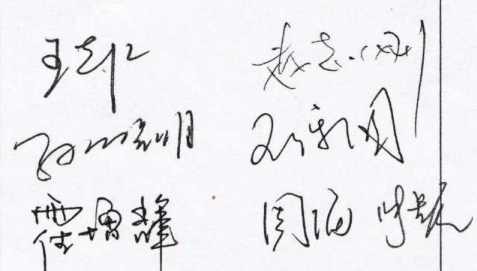                                                                                                                                                                                                                                                                                                                                            |                       |
| <p>评审意见</p> <p style="text-align: center;">经伦理委员会审议符合相关要求和要求，同意项目实施。</p> <div style="display: flex; justify-content: space-around; align-items: center;">    </div> |                       |
| 负责人签字                                                                                                                                                                                                                                                                                                                                                                                                                         | 日期 2007-1-10          |
